# Supplementary material for: FSI-inspired solvent and “full fluorosulfonyl” electrolyte for 4 V class lithium-metal batteries
Source: Royal Society of Chemistry journal article supplement (doi:10.1039/c9ee02538c), 2019-11-20
Supplement: c9ee02538c1.pdf [file c9ee02538c1.pdf]

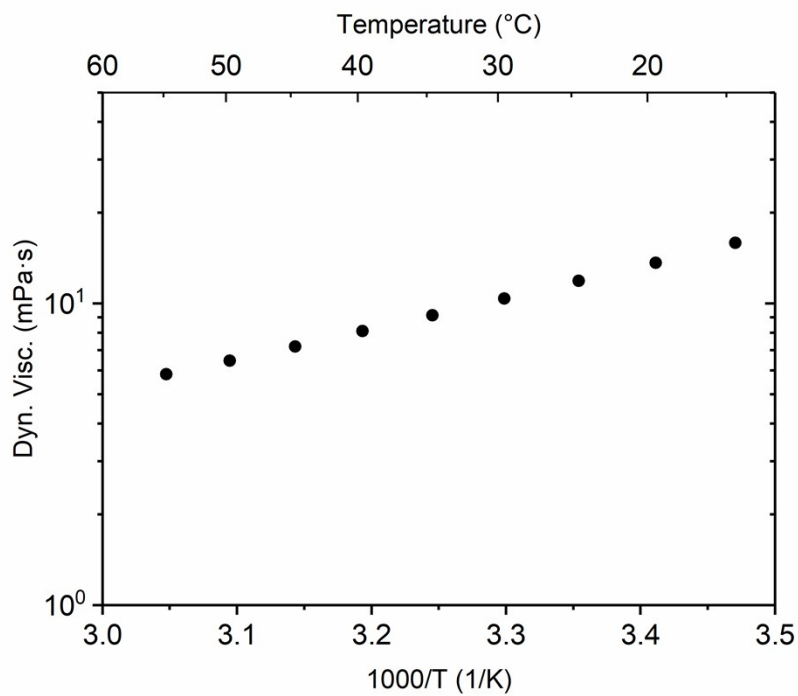

**Fig. S1.** Arrhenius plot of dynamic viscosity for 2.5 m LiFSI and 0.2 m LiPF<sub>6</sub> in the FSA solvent

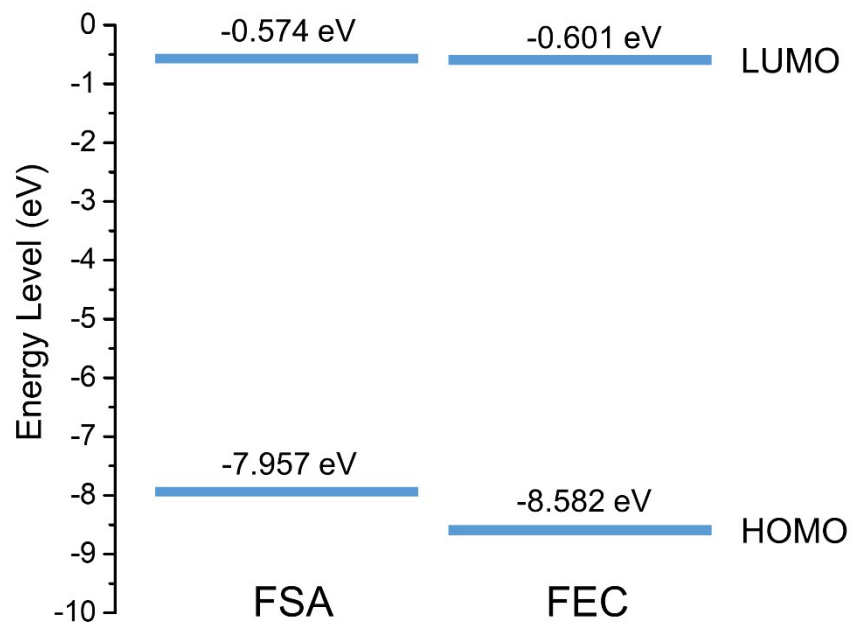

**Fig. S2** The lowest unoccupied molecular orbital (LUMO) and the highest occupied molecular orbital (HOMO) energy values of FSA and FEC obtained by DFT simulations

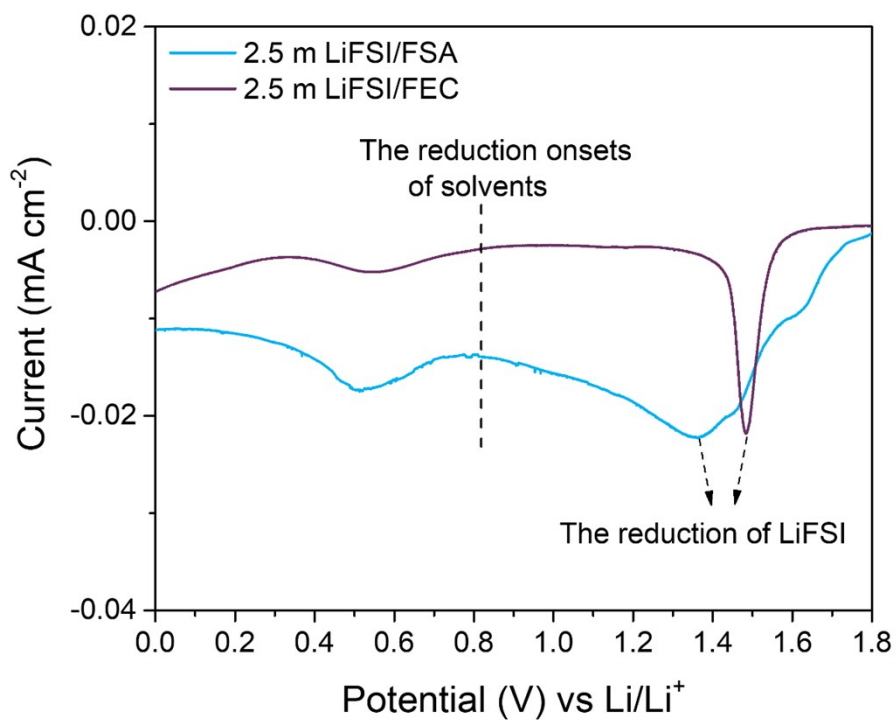

**Fig. S3** Linear sweep voltammetry (LSV) results of the electrolytes with 2.5 m LiFSI in FEC or FSA at a scan rate of 0.2 mV s<sup>-1</sup> tested in coin cells with Li and Cu as the working and counter electrodes, respectively.

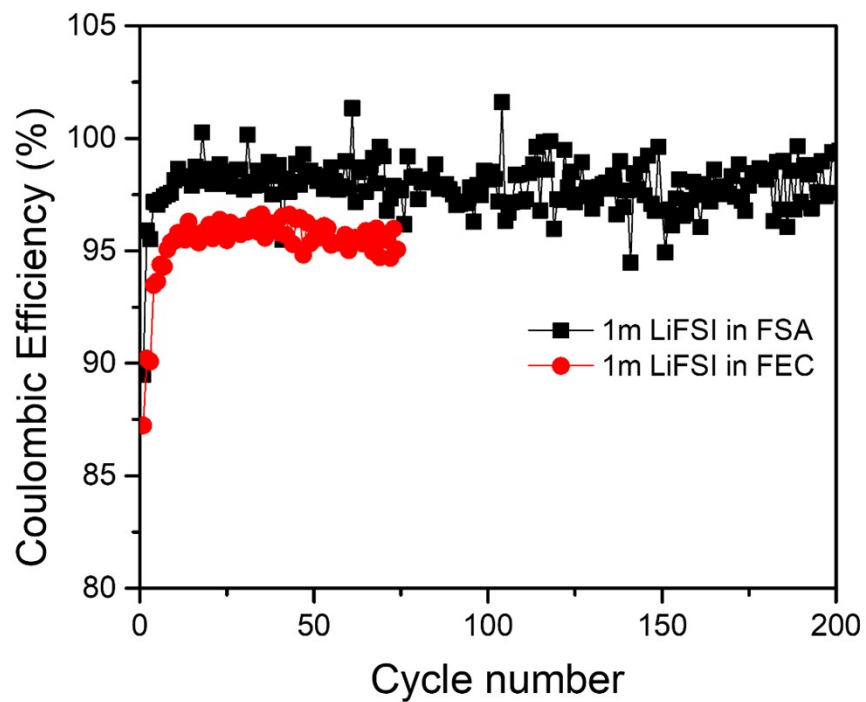

**Fig. S4** Li stripping/plating CEs using 1 m LiFSI in FSA and 1 m LiFSI in FEC electrolytes. The current density is  $0.5 \text{ mA cm}^{-2}$  and capacity  $0.5 \text{ mAh cm}^{-2}$ .

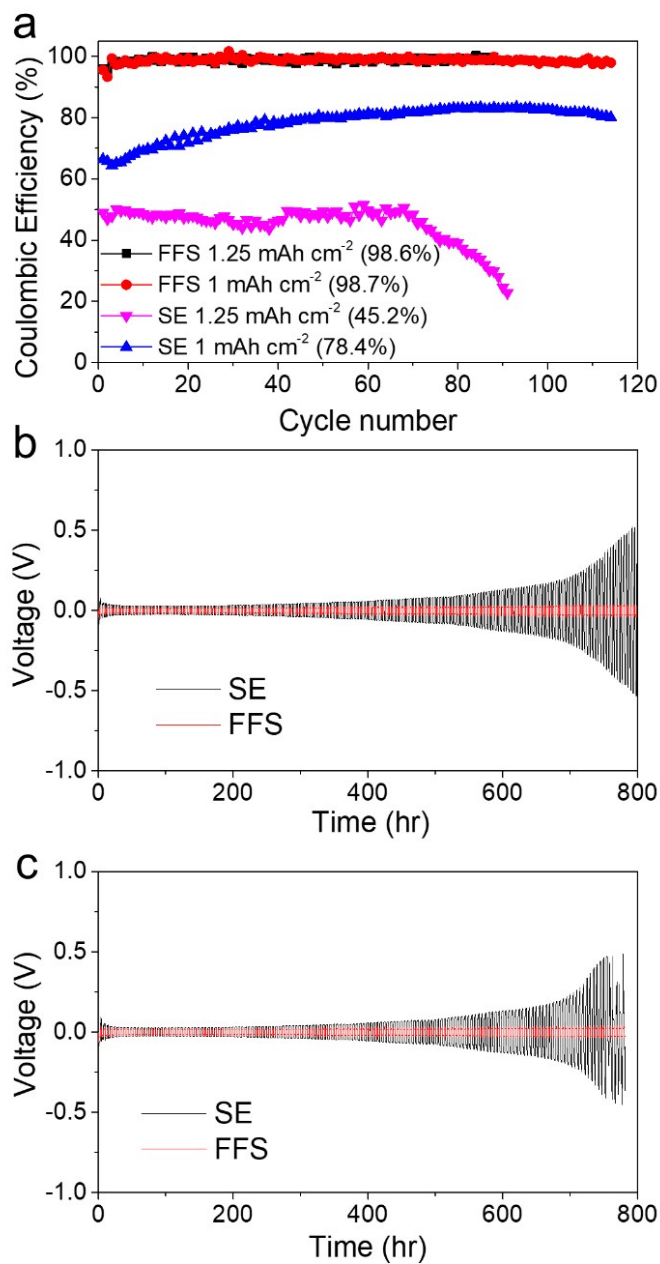

**Fig. S5** Electrochemical performances of the Li plating/stripping in FFS and SE electrolytes. (a) Li plating/stripping CEs evaluated by Li||Cu coin cells (1 and 1.25 mAh cm<sup>-2</sup> at 0.5 mA cm<sup>-2</sup>); Li||Li plating/stripping from Li||Li symmetric cells with 1 mAh cm<sup>-2</sup> (b) and 1.25 mAh cm<sup>-2</sup> (c) at 0.5 mA cm<sup>-2</sup>, respectively.

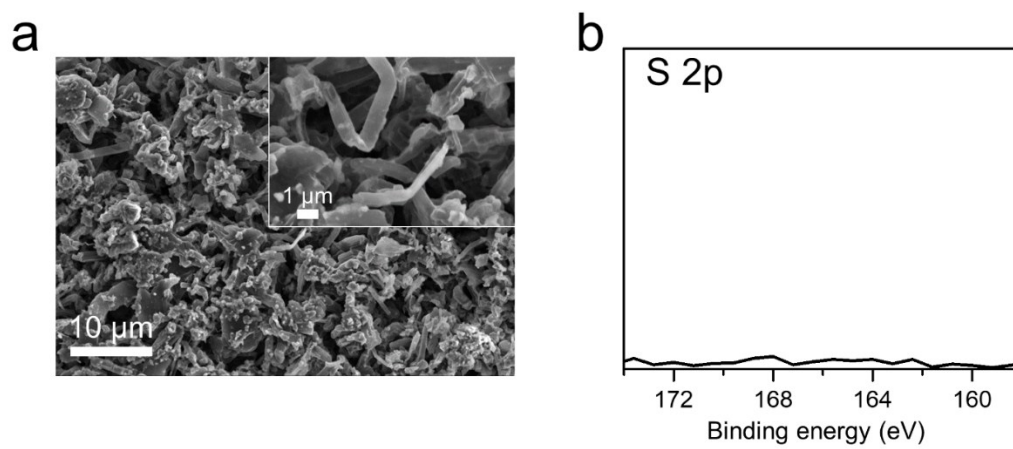

**Fig. S6** Characterization of the cycled Li in SE (10 cycles,  $0.5 \text{ mA cm}^{-2}$ ,  $0.5 \text{ mAh cm}^{-2}$ ). (a) SEM figure (inset is the high resolution figure); (b) S 2p spectrum from XPS analysis.

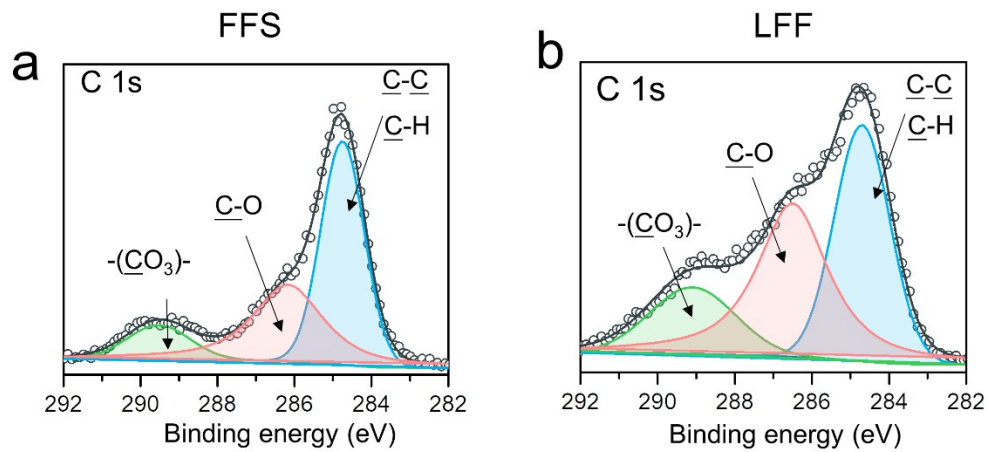

**Fig. S7** XPS spectra (C 1s) of the cycled Li in FFS (a) and LFF (b) electrolytes (10 cycles, 0.5 mA  $\text{cm}^{-2}$ , 0.5 mAh  $\text{cm}^{-2}$ )

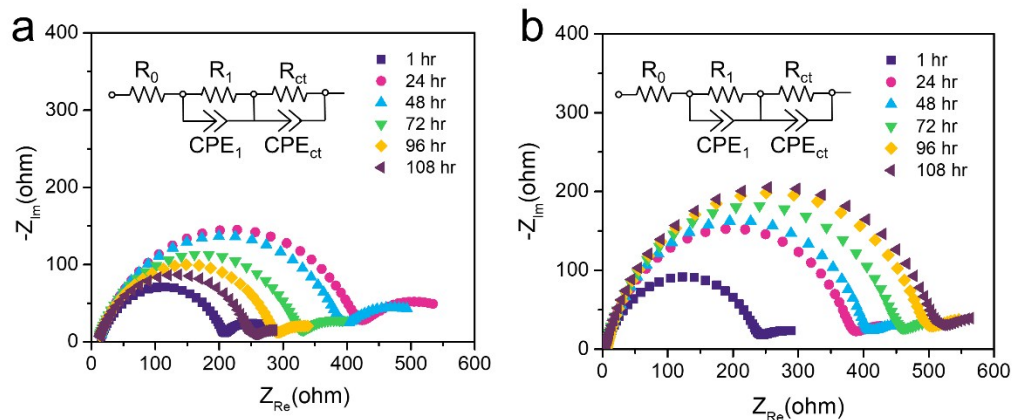

**Fig. S8** The evolution of impedance spectra of the Li||Li symmetric cell with resting time in LFF (a) and SE (b) electrolytes.

The wettability of FEC-based LFF electrolyte is so poor that glass fiber separator with large pores and hydrophilic surface has to be used instead of the Celgard separator to improve wetting. Therefore, for LFF electrolyte, the time-consuming wetting process should also contribute to  $R_1$  ( $R_1 = R_{SEI} + R_{wetting}$ ). When the wetting proceeds upon resting time,  $R_{wetting}$  decreases quickly resulting in the decrease in  $R_1$ .



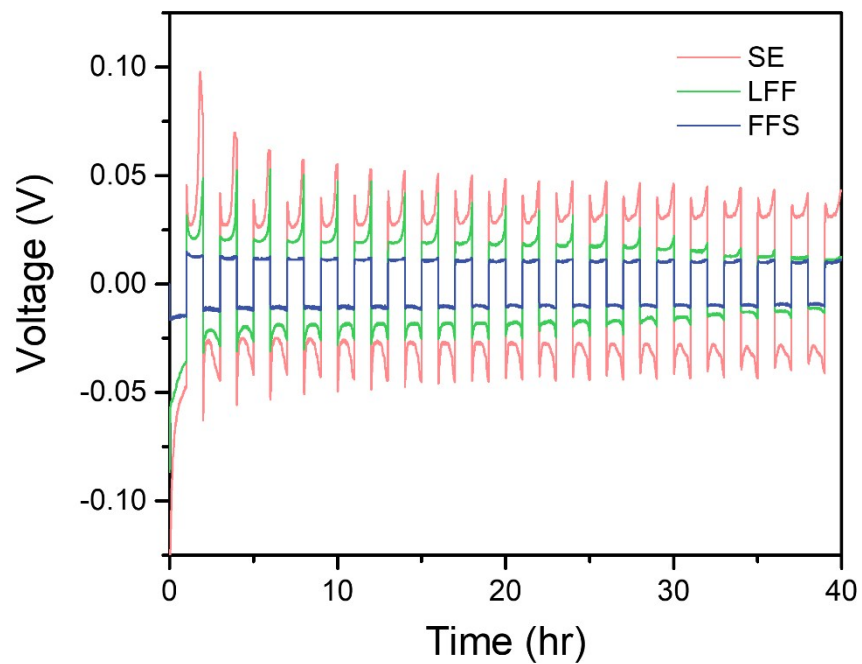

**Fig. S9** The initial cycles of the Li||Li symmetric cells in different electrolytes tested after 108 hr rest. All cells were operated at a current density of  $0.5 \text{ mA cm}^{-2}$  with a capacity of  $0.5 \text{ mAh cm}^{-2}$

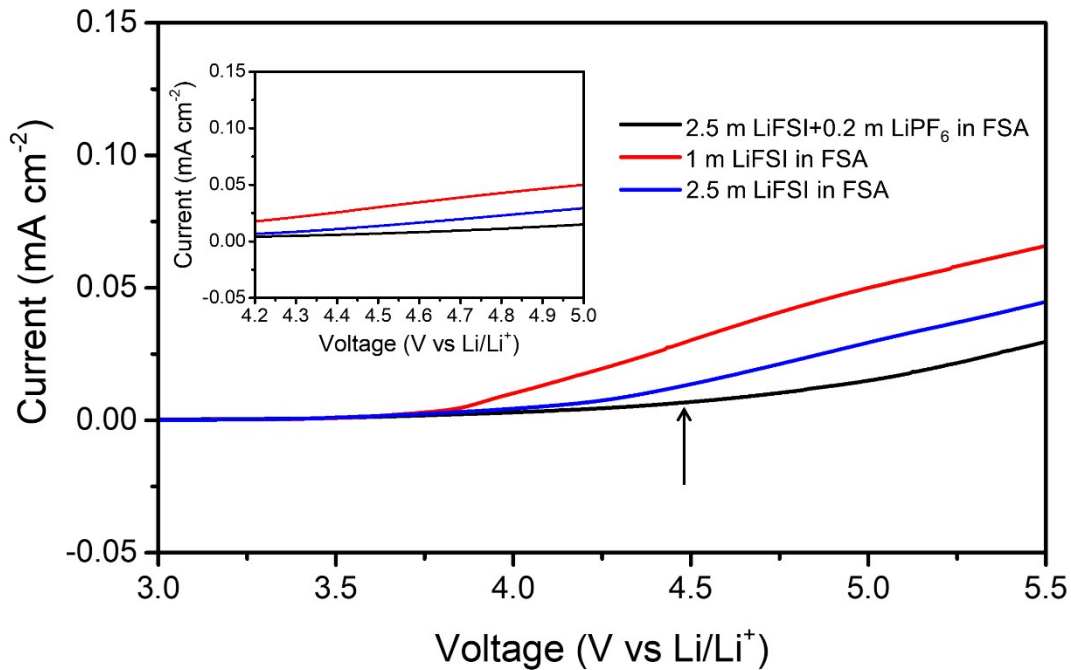

**Fig. S10** LSV results of the anodic stability of Al electrodes by using Li||Al coin cells within 3.0 V~5.5 V using 1 m LiFSI in FSA, 2.5 m LiFSI in FSA and 2.5 m LiFSI+0.2 m LiPF<sub>6</sub> in FSA electrolytes. The addition of 0.2 m LiPF<sub>6</sub> obviously suppresses the Al corrosion for 2.5 m LiFSI in FSA electrolyte improving the anodic stability to ~4.5 V which fulfills the requirement for the NMC622 cathode. Inset: magnified view of 4.2~5.0 V region.

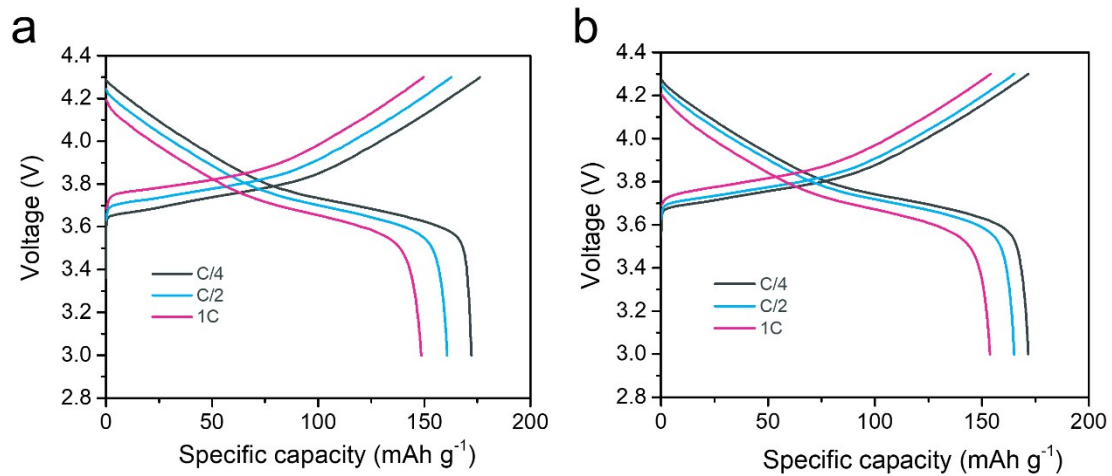

**Fig. S11** Voltage profiles of the Li||NMC622 cells using the SE (a) and LFF (b) electrolytes at C/4, C/2 and 1C

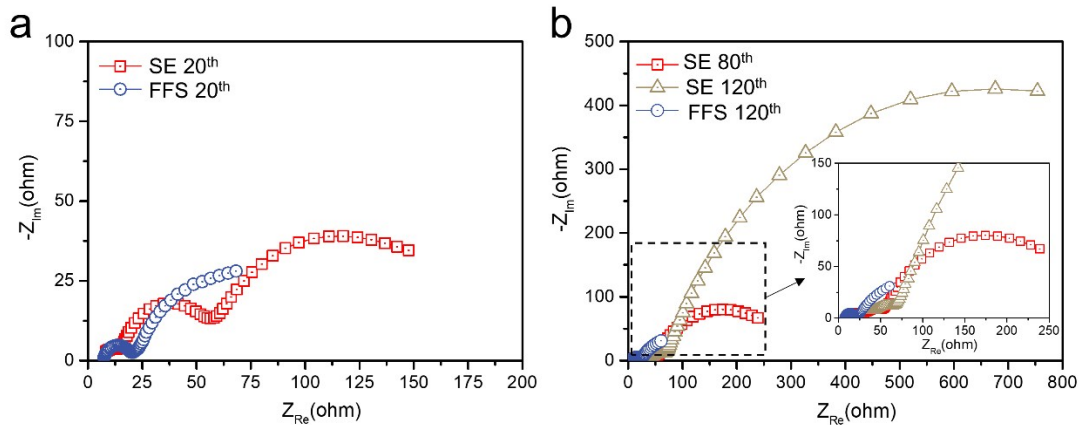

**Fig. S12** The evolution of impedance spectra of the Li||NMC622 cells in FFS and SE electrolytes after 20<sup>th</sup> (a) and 80<sup>th</sup>/120<sup>th</sup> (b) cycles

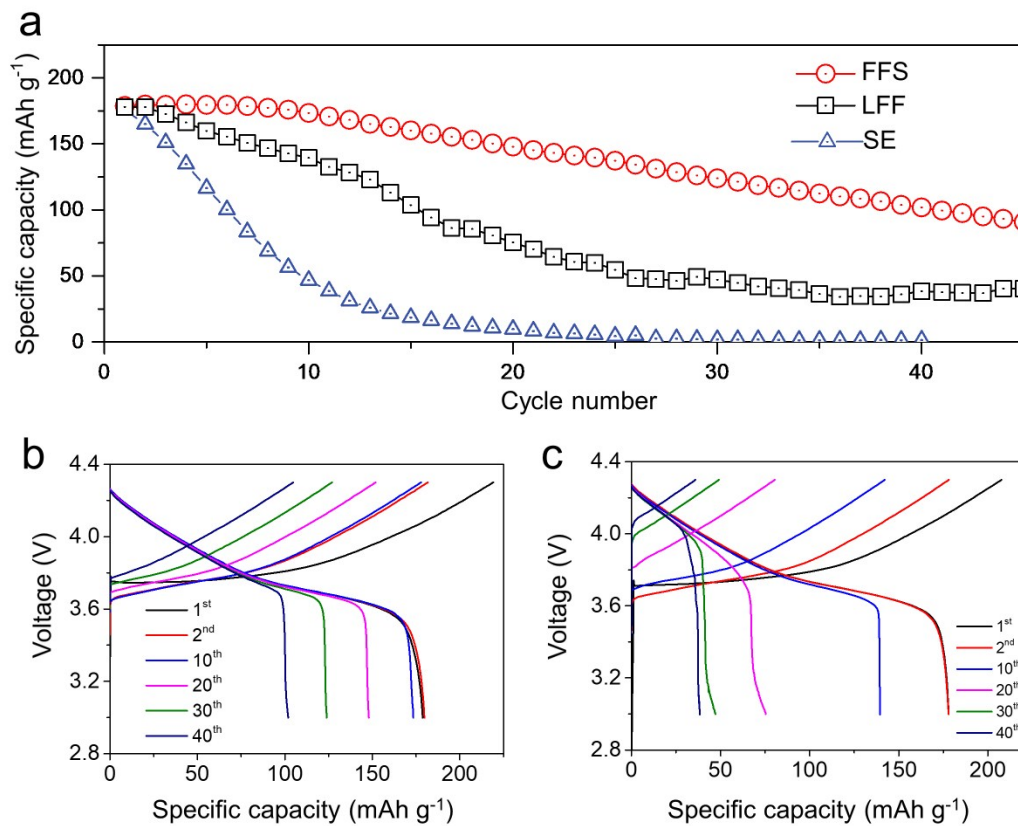

**Fig. S13** The electrochemical performances of the anode-free full cells (Cu||NMC622) using FFS, LFF and SE electrolytes. (a) Cycling performance. The charge-discharge voltage profiles (1<sup>st</sup>, 2<sup>nd</sup>, 10<sup>th</sup>, 20<sup>th</sup>, 30<sup>th</sup> and 40<sup>th</sup> cycle) of the cells using FFS (b) and LFF (c) electrolytes.

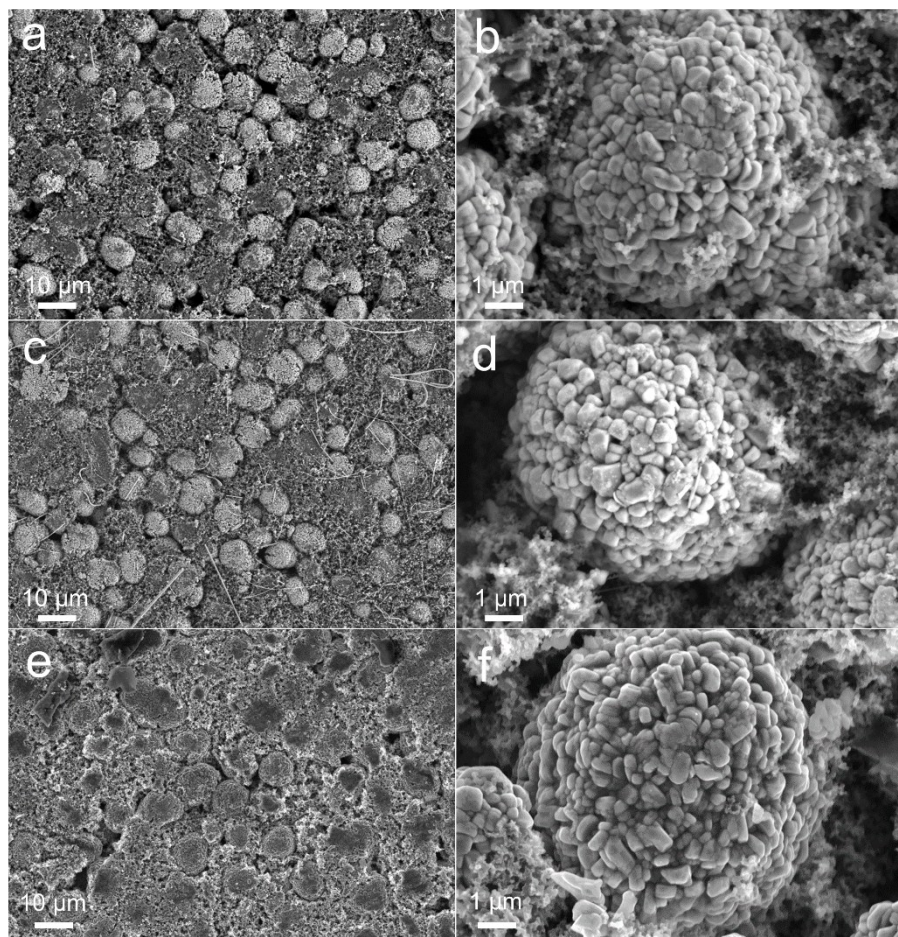

**Fig. S14** SEM figures with low and high magnification of the NMC622 cathodes after 100 cycles at 0.5 C in FFS (a, b), LFF (c, d) and SE (e, f) electrolytes

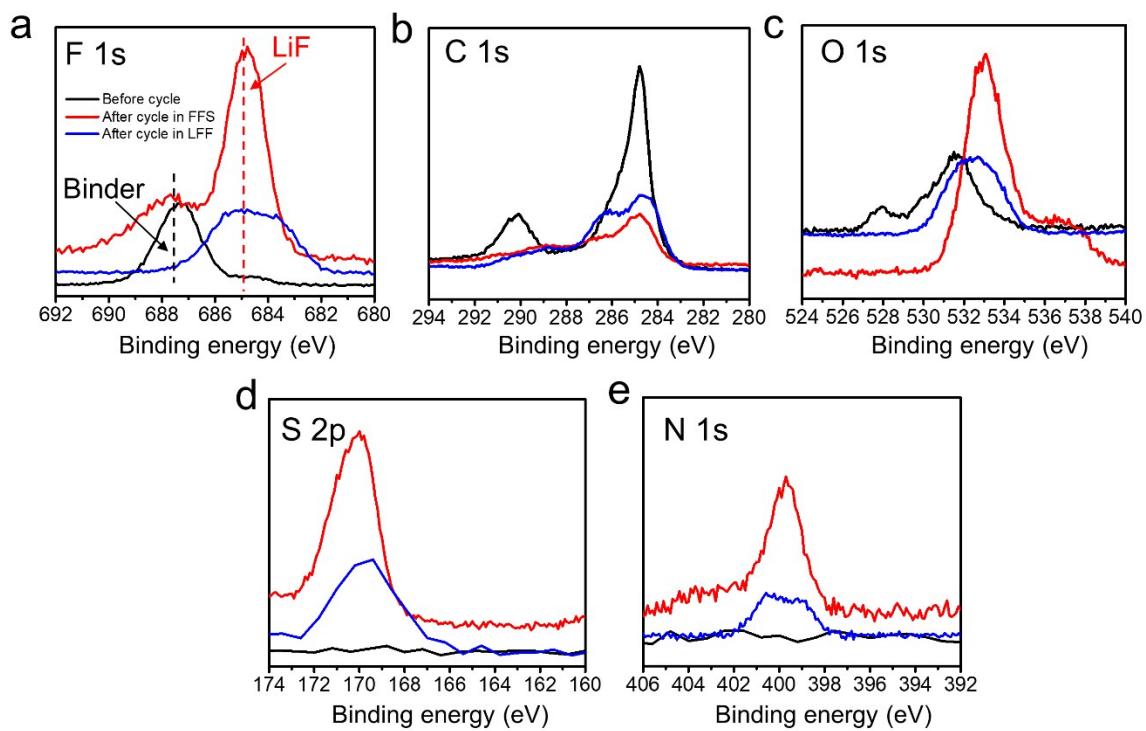

**Fig. S15** XPS spectra of the NMC622 cathodes before (black line) and after 100 cycles at 0.5 C in FFS (red line) and LFF (blue line) electrolytes. (a) F 1s, (b) C 1s, (c) O1s, (d) S 2p, (e) N 1s.

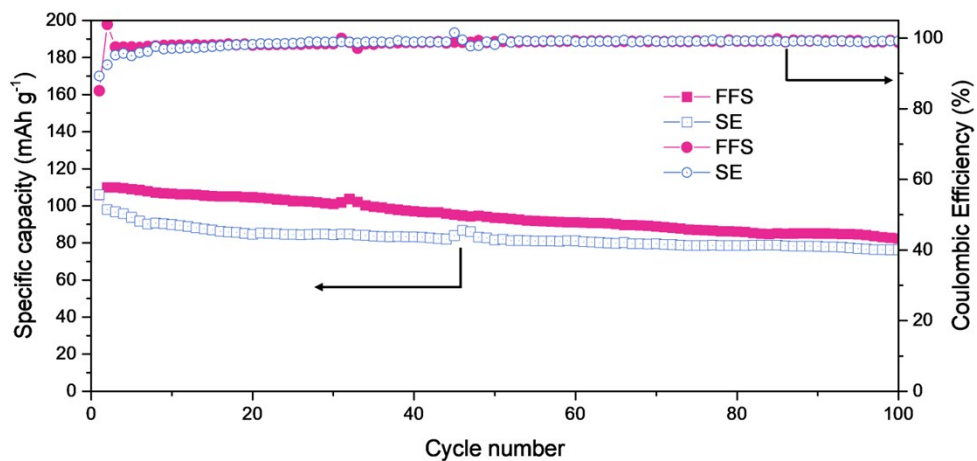

**Fig. S16** Cycling performance of the Li||LiMn<sub>2</sub>O<sub>4</sub> cells with FFS and SE electrolytes. The cells were cycled at 0.5 C from 3.0 V to 4.3 V.



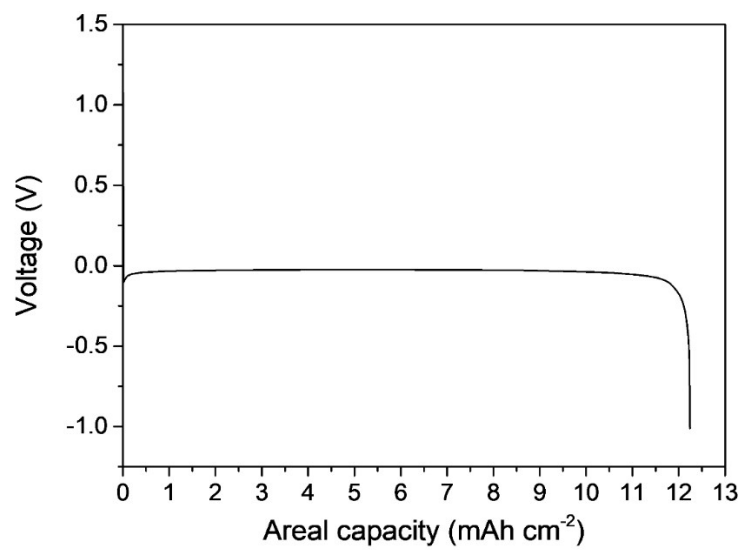

**Fig. S17** The areal capacity of the thin Li (60  $\mu\text{m}$ ) foil evaluated by a Li||Cu cell

**Table S1.** Dynamic viscosity and density as a function of temperature for 2.5 m LiFSI and 0.2 m LiPF<sub>6</sub> in the FSA solvent.

| Temperature (°C) | Dyn. Visc. (mPa·s) | Shear Rate (s <sup>-1</sup> ) | Density (g cm <sup>-3</sup> ) |
|------------------|--------------------|-------------------------------|-------------------------------|
| 15               | 15.880             | 432.9                         | 1.49667                       |
| 20               | 13.640             | 467.5                         | 1.49024                       |
| 25               | 11.875             | 498.9                         | 1.48388                       |
| 30               | 10.378             | 529.7                         | 1.47738                       |
| 35               | 9.1283             | 558.0                         | 1.47121                       |
| 40               | 8.0982             | 585.0                         | 1.46501                       |
| 45               | 7.2001             | 611.3                         | 1.45898                       |
| 50               | 6.4557             | 634.7                         | 1.45274                       |
| 55               | 5.8270             | 655.2                         | 1.44660                       |

**Table S2.** Comparison of our work with recent excellent works on electrolytes for LMBs

| Category               | Composition                                          | Lithium metal side (evaluated by Li-Cu cells) |                   |                   |                     | Cathode side (>4.0 V) | High concentration | Pretreatment of substrate <sup>†</sup>               |
|------------------------|------------------------------------------------------|-----------------------------------------------|-------------------|-------------------|---------------------|-----------------------|--------------------|------------------------------------------------------|
|                        |                                                      | Current density                               | Initial CE (ICE)  | ECN <sup>*</sup>  | Average CE          |                       |                    |                                                      |
| <b>New electrolyte</b> | <b>2.5 m LiFSI+0.2 m LiPF<sub>6</sub> in FSA</b>     | <b>0.5 mA cm<sup>-2</sup></b>                 | <b>91%</b>        | <b>10</b>         | <b>99.03%</b>       | <b>YES</b>            | <b>NO</b>          | <b>NO</b>                                            |
| Carbonate-based        | 10 M LiFSI in DMC <sup>1</sup>                       | 0.2 mA cm <sup>-2</sup>                       | ~89%              | >80               | ~98.7% <sup>#</sup> | YES                   | YES                | NO                                                   |
|                        | 7 m LiFSI in FEC <sup>2</sup>                        | 0.5 mA cm <sup>-2</sup>                       | ~89% <sup>#</sup> | >300 <sup>#</sup> | ~97.72%             | YES                   | YES                | NO                                                   |
|                        | 1 M LiPF <sub>6</sub> in FEC/FEMC/HFE <sup>3</sup>   | 0.5 mA cm <sup>-2</sup>                       | ~92%              | >100 <sup>#</sup> | < 99%               | YES                   | NO                 | NO                                                   |
| Sulfone-based          | LiFSI-3TMS-3TTE <sup>4</sup>                         | 0.5 mA cm <sup>-2</sup>                       | —                 | ~20 <sup>#</sup>  | 98.8%               | YES                   | NO                 | 5 mAh cm <sup>-2</sup> Li pre-deposited and stripped |
| Ether-based            | LiTFSI+LiN O <sub>3</sub> +LiFSI in DME <sup>5</sup> | 0.5 mA cm <sup>-2</sup>                       | 92%               | —                 | 99.1%               | NO                    | NO                 | NO                                                   |
|                        | 4 M LiFSI in DME <sup>6</sup>                        | 0.2 mA cm <sup>-2</sup>                       | —                 | —                 | 99.1%               | NO                    | YES                | NO                                                   |
|                        | 4.6 m LiFSI+ 2.3 m LiTFSI in DME <sup>7</sup>        | 0.5 mA cm <sup>-2</sup>                       | 82.11%            | —                 | 97.9%               | YES                   | YES                | NO                                                   |
|                        | 1.2 m LiFSI in DMC-BTFE <sup>8</sup>                 | 0.5 mA cm <sup>-2</sup>                       | ~93% <sup>#</sup> | ~30 <sup>#</sup>  | ~99%                | YES                   | NO                 | NO                                                   |
|                        | 2 M LiTFSI + 2 M LiDFOB in DME <sup>9</sup>          | —                                             | —                 | —                 | 94.6%               | YES                   | YES                | NO                                                   |
|                        | LiFSI-1.2DME-3TTE <sup>10</sup>                      | 0.5 mA cm <sup>-2</sup>                       | —                 | 13 <sup>#</sup>   | >99.3%              | YES                   | NO                 | NO                                                   |

<sup>†</sup>Substrates after pretreatments may possibly result in improved CE values compared to those without pretreatment

<sup>\*</sup>Essential cycle number (ECN) from ICE to >99%

<sup>#</sup>Estimated values, could not find the exact numbers in texts

**Supplementary List** List of abbreviations (arranged in alphabetical order)

CE: Coulombic Efficiency  
CEI: Cathode Electrolyte Interface  
CI: Coulombic Inefficiency  
DFT: Density Functional Theory  
DEC: Diethyl Carbonate  
DMC: Dimethyl Carbonate  
DOL: Dimethoxyethane  
EC: Ethylene Carbonate  
ECN: Essential Cycle Number from ICE to SCE  
EIS: Electrochemical Impedance Spectroscopy  
FEC: Fluoroethylene Carbonate  
FFS: Full Fluorosulfonyl (electrolyte)  
FSA: Fluorosulfonamide  
HCEs: High Concentration Electrolytes  
HOMO: Highest Occupied Molecular Orbital  
ICE: Initial Coulombic Efficiency  
LFF: LiFSI in FEC (electrolyte)  
LIBs: Lithium-ion Batteries  
LiFSI: Lithium Bis(fluorosulfonyl)imide  
LHCEs: Localized High Concentration Electrolytes  
LMA: Lithium Metal Anode  
LMBs: Lithium Metal Batteries  
LSV: Linear Sweep Voltammetry  
LUMO: Lowest Unoccupied Molecular Orbital  
NMC622:  $\text{LiNi}_{0.6}\text{Mn}_{0.2}\text{Co}_{0.2}\text{O}_2$   
SCE: Stabilized Coulombic Efficiency  
SE: Standards Electrolyte  
SEI: Solid Electrolyte Interface  
SEM: Scanning Electron Microscope  
XPS: X-ray Photoelectron Spectroscopy  
XRD: X-ray Diffraction

## Supplementary References

1. Fan X, *et al.* Highly Fluorinated Interphases Enable High-Voltage Li-Metal Batteries. *Chem* **4**, 174-185 (2018).
2. Suo L, *et al.* Fluorine-donating electrolytes enable highly reversible 5-V-class Li metal batteries. *Proceedings of the National Academy of Sciences of the United States of America* **115**, 1156-1161 (2018).
3. Fan X, *et al.* Non-flammable electrolyte enables Li-metal batteries with aggressive cathode chemistries. *Nature nanotechnology*, (2018).
4. Ren X, *et al.* Localized High-Concentration Sulfone Electrolytes for High-Efficiency Lithium-Metal Batteries. *Chem* **4**, 1877-1892 (2018).
5. Feilong Qiu, *et al.* A Concentrated Ternary-Salts Electrolyte for High Reversible Li Metal Battery with Slight Excess Li. *Adv Energy Mater*, 1803372 (2018).
6. Qian J, *et al.* High rate and stable cycling of lithium metal anode. *Nat Commun* **6**, 6362 (2015).
7. Alvarado J, *et al.* Bisalt ether electrolytes: a pathway towards lithium metal batteries with Ni-rich cathodes. *Energy & Environmental Science* **12**, 780-794 (2019).
8. Chen S, *et al.* High-Voltage Lithium-Metal Batteries Enabled by Localized High-Concentration Electrolytes. *Adv Mater*, e1706102 (2018).
9. Jiao S, *et al.* Stable cycling of high-voltage lithium metal batteries in ether electrolytes. *Nat Energy* **3**, 739-746 (2018).
10. Ren X, *et al.* Enabling High-Voltage Lithium-Metal Batteries under Practical Conditions. *Joule*, (2019).
